# Supplementary material
Source: PubMed Central journal article supplement (PMC3416513)
Supplement: JB.00156-12_zjb999091686so1.pdf [file JB.00156-12_zjb999091686so1.pdf]

## Supplemental information

**TableS1. Primers used in this study**

| Primer               | Sequence(5'-3')                  | Application               |
|----------------------|----------------------------------|---------------------------|
| <i>ccpA</i> -28a-F   | CAGCCATATGATGAACACAGACGACACA     | Expression of <i>ccpA</i> |
| <i>ccpA</i> -28a-R   | CCGGATCCTTATTTACGAGTTGATTTACGCT  | Expression of <i>ccpA</i> |
| <i>ccpA</i> -upF     | TGAATCGAAGCTACCAAATCTATCG        | Deletion of <i>ccpA</i>   |
| <i>ccpA</i> -upR     | AAGGATCCTGTGTCTGTGTTC            | Deletion of <i>ccpA</i>   |
| <i>ccpA</i> -dnF     | AAGGATCCTGAAGACTTCGAAATC         | Deletion of <i>ccpA</i>   |
| <i>ccpA</i> -dnR     | TCTTATTTACGAGTTGATTTACGCTCAC     | Deletion of <i>ccpA</i>   |
| Bi- <i>ccpA</i> -upF | TACCAAATCTATCGCGATTTAGTCTTTG     | Deletion of <i>ccpA</i>   |
| Bi- <i>ccpA</i> -upR | TATAAAGCTTCTGTGTCTGTGTTCG        | Deletion of <i>ccpA</i>   |
| Bi- <i>ccpA</i> -dnF | TATACCCGGGTGAGCGTAAATCAACTC      | Deletion of <i>ccpA</i>   |
| Bi- <i>ccpA</i> -dnR | AGCACCATAAAGATTGTCCATATCC        | Deletion of <i>ccpA</i>   |
| <i>manL</i> -upF     | CCAGCACTAGGTCTGTCCTC             | Deletion of <i>manL</i>   |
| <i>manL</i> -upR     | AAGGATCCAACCTGACTGATGAATGC       | Deletion of <i>manL</i>   |
| <i>manL</i> -dnF     | AAGGATCCGTACCAAATGACTCTAAG       | Deletion of <i>manL</i>   |
| <i>manL</i> -dnR     | ACAGCCATACCGCCTGCC               | Deletion of <i>manL</i>   |
| <i>lacA</i> -upF     | AAGGATCCAATGATAATAGACATGTTAAGTCC | Deletion of <i>lacA</i>   |
| <i>lacA</i> -upR     | CTTTGCTATTGAGAATACAGAGGAGATG     | Deletion of <i>lacA</i>   |
| <i>lacA</i> -dnF     | TGAAAGAACACGTGTAACATTGAGCC       | Deletion of <i>lacA</i>   |
| <i>lacA</i> -dnR     | AAGGATCCAAGATGTGCTAATGCTCTG      | Deletion of <i>lacA</i>   |
| <i>galK</i> -upF     | AAGGATCCGATTTGCTCTACTGAAATG      | Deletion of <i>galK</i>   |
| <i>galK</i> -upR     | GAGAATCTCATAGCCCAATTCCTG         | Deletion of <i>galK</i>   |
| <i>galK</i> -dnF     | AAGGATCCTTTTACATTGCAGAAGTAGC     | Deletion of <i>galK</i>   |
| <i>galK</i> -dnR     | CTGGCTTAGAGAGATTGATGGTG          | Deletion of <i>galK</i>   |
| <i>EIIABC</i> -upF   | AAGGATCCAAGCGCCATTTTCATC         | Deletion of <i>EIIABC</i> |
| <i>EIIABC</i> -upR   | ATGTGCGGATCTGATTGCTGAAG          | Deletion of <i>EIIABC</i> |
| <i>EIIABC</i> -dnF   | GGAGAG AGGAACACTGCAAG            | Deletion of <i>EIIABC</i> |

|                                  |                                  |                                  |
|----------------------------------|----------------------------------|----------------------------------|
| <i>EIIABC</i> -dnR               | AAGGATCCAGCAAATGATCAAACGG        | Deletion of <i>EIIABC</i>        |
| <i>hprK</i> -upF                 | TGGTGATTTTCTCTGTATGCGACGATC      | Deletion of <i>hprK</i>          |
| <i>hprK</i> -upR                 | ATATGGATCCAGACATTCCCTGCTC        | Deletion of <i>hprK</i>          |
| <i>hprK</i> -dnF                 | ATATGGATCCA GTAGCTTTTA CAGTTGGTC | Deletion of <i>hprK</i>          |
| <i>hprK</i> -dnR                 | AGACAGCCACTGAGATACACGAAC         | Deletion of <i>hprK</i>          |
| RT- <i>lacD</i> , <i>lacC</i> -F | TCTGCTTCTTGGTGTTGAGC             | RT-PCR                           |
| RT- <i>lacD</i> , <i>lacC</i> -R | ACAAACAACACTACATGTAAGGACGG       | RT-PCR                           |
| RT- <i>lacC</i> , <i>lacB</i> -F | TGGATGGGTTTCATAGTGACTG           | RT-PCR                           |
| RT- <i>lacC</i> , <i>lacB</i> -R | TGGTGAATTGCTTATGTGCG             | RT-PCR                           |
| RT- <i>lacB</i> , <i>lacA</i> -F | TTGGTAACGATATGGTCAACATC          | RT-PCR                           |
| RT- <i>lacB</i> , <i>lacA</i> -R | CAGATTGTTAGCTGGTTTTGTC           | RT-PCR                           |
| RT- <i>lacA</i> , <i>lacX</i> -F | AATCTCAAACCTGCAGCATC             | RT-PCR                           |
| RT- <i>lacA</i> , <i>lacX</i> -R | AGAAGACAAGAAAACGTTTCGC           | RT-PCR                           |
| RT- <i>lacX</i> , <i>EIIC</i> -F | TTTTGTAGCACAATCACCATCC           | RT-PCR                           |
| RT- <i>lacX</i> , <i>EIIC</i> -R | ACAGAAAGCAAATGATCAAACG           | RT-PCR                           |
| RT- <i>EIIC</i> , <i>EIIB</i> -F | TGTCAAGATGATCAGCATGATG           | RT-PCR                           |
| RT- <i>EIIC</i> , <i>EIIB</i> -R | TCCGTATTCCTGCAATGAGC             | RT-PCR                           |
| RT- <i>EIIB</i> , <i>EIIA</i> -F | AGAGCACTCTTGATTTGGTGAC           | RT-PCR                           |
| RT- <i>EIIB</i> , <i>EIIA</i> -R | AATTCGAGCTCAAGCCAGAC             | RT-PCR                           |
| RT- <i>EIIA</i> , <i>lacR</i> -F | ACAAACTATTGACAGCGCTATCAC         | RT-PCR                           |
| RT- <i>EIIA</i> , <i>lacR</i> -R | TGTTTGGGATAAGATATCGTTCC          | RT-PCR                           |
| <i>gal</i> -p- <i>Bam</i> HI     | AAGGATCCAAGCGCCATTTCACTTC        | Construction of <i>Pgal-luc</i>  |
| <i>gal</i> -p- <i>Nhe</i> I      | AAAAAGCTAGCATTGTGACCAATTCTCTCCC  | Construction of <i>Pgal-luc</i>  |
| <i>gal</i> -p-deF                | TCGGATCAGGTACCACAACAG            | Construction of <i>Pgal-luc</i>  |
| <i>manL</i> -p- <i>Bam</i> HI    | TTGGATCCAATACTCATTATTGTTTTTCC    | Construction of <i>PmanL-luc</i> |
| <i>manL</i> -p- <i>Nhe</i> I     | TATAAGCTAGCTTCTTAGACATTTTTTACTCC | Construction of <i>PmanL-luc</i> |
| <i>manL</i> -p-deF               | ACATAAGCAGCATTCCAAGGC            | Construction of <i>PmanL-luc</i> |
| qPCR- <i>EIIB</i> -F             | GCAGCGATTGGTGTGAAG               | qPCR of <i>EIIB</i>              |

|                            |                                                                 |                                              |
|----------------------------|-----------------------------------------------------------------|----------------------------------------------|
| qPCR- <i>EIIB</i> -R       | GAGTGCTCTTGAGGAAGAATTG                                          | qPCR of <i>EIIB</i>                          |
| qPCR- <i>16s</i> -F        | CGATACATAGCCGACCTGAGAG                                          | qPCR of <i>16SrRNA</i>                       |
| qPCR- <i>16s</i> -R        | TCCGTCCATTGCCGAAGATTC                                           | qPCR of <i>16SrRNA</i>                       |
| qPCR- <i>manL</i> -F       | AATGGTTGTTGCCGTTGG                                              | qPCR of <i>manL</i>                          |
| qPCR - <i>manL</i> -R      | AAGGTTGAGGTAGATAAGGGCG                                          | qPCR of <i>manL</i>                          |
| <i>galp</i> -F EMSA        | biotin-TCGGATGCTTTTTGTAAAAATCAATC                               | EMSA                                         |
| <i>galp</i> -R EMSA        | TTCATCACTTCTCCTTTTTTGTTC                                        | EMSA                                         |
| <i>Ngalp</i> -F EMSA       | TCGGATGCTTTTTGTAAAAATCAATC                                      | EMSA                                         |
| <i>Ngalp</i> -R EMSA       | TTCATCACTTCTCCTTTTTTGTTC                                        | EMSA                                         |
| <i>manLin</i> -F EMSA      | biotin-TAACCAA GCTAGCCGTG TCATG                                 | EMSA                                         |
| <i>manLin</i> -R EMSA      | AGTTCCTTCTGGGATAGCTGC                                           | EMSA                                         |
| <i>manLp</i> -F EMSA       | biotin-CTTCTTGGGCTTCAGCTATAAATTC                                | EMSA                                         |
| <i>manLp</i> -R EMSA       | CTATTATTATAAAACGTTTTTCATGAAAAATGC                               | EMSA                                         |
| <i>galp-cre</i> -F<br>EMSA | CATAATGATATAATTAATTAACGAACAAAAAG<br>AAACAAAAAAGGAGAAGTGATGAA    | EMSA                                         |
| <i>galp-cre</i> -R<br>EMSA | GTTTCGTTAATTAATTATATCATTATGATAGTTT<br>GTTTTGTTATTTTTTGTTTATTTG  | EMSA                                         |
| <i>com box</i><br>-F-EMSA  | biotin-TTGAGAAAATGACATTTTCAGGAATAAA<br>AAATGACATTTTCAGGGAAAGATG | EMSA                                         |
| <i>com box</i> -R-EMSA     | CATCTTCCCTGAAATGTCATTTTTTATTCCTG<br>AAATGTCATTTTCTCAA           | EMSA                                         |
| CAT- <i>ScaI</i>           | TAAATAGTACTATGAACTTTAATAAAATTGAT<br>TTAG                        | Construction of<br>pFW5- <i>luc-cat-manL</i> |
| CAT- <i>SalI</i>           | TATATGTCGACTTATAAAAGCCAGTCATTAG                                 | Construction of<br>pFW5- <i>luc-cat-manL</i> |
| pFW5- <i>luc-ScaI</i>      | TATATAGTACTCCTCCTCACTATTTTGATTAGT<br>ACC                        | Construction of<br>pFW5- <i>luc-cat-manL</i> |
| pFW5- <i>luc-SalI</i>      | ATTTAGTCGACTGAAAAAATGGTGGAAC                                    | Construction of                              |

---

pFW5-*luc-cat-manL*

---

**Table S2. The *gal-luc* reporter gene expression in the wild-type strain grown in TY broth supplemented with different sugars**

| <b>Supplemented sugars<sup>a</sup></b> | <b>RLU (<math>\times 10^6</math>)</b> |
|----------------------------------------|---------------------------------------|
| Galactose (0)                          | 8.29 $\pm$ 0.57                       |
| Galactose (0.025%, w/v)                | 29.43 $\pm$ 0.47                      |
| Galactose (0.05%, w/v)                 | 27.55 $\pm$ 2.06                      |
| Galactose (0.1%, w/v)                  | 21.81 $\pm$ 1.10                      |
| Galactose (0.5%, w/v)                  | 12.56 $\pm$ 1.99                      |
| Glucose                                | 1.06 $\pm$ 0.12                       |
| Glucose+Galactose                      | 0.93 $\pm$ 0.18                       |
| Fructose                               | 1.60 $\pm$ 0.09                       |
| Fructose+Galactose                     | 5.43 $\pm$ 0.47                       |
| Mannose                                | 0.93 $\pm$ 0.14                       |
| Mannose+Galactose                      | 0.92 $\pm$ 0.11                       |
| Sucrose                                | 1.05 $\pm$ 0.04                       |
| Sucrose+Galactose                      | 4.33 $\pm$ 0.45                       |
| Maltose                                | 0.98 $\pm$ 0.03                       |
| Maltose+Galactose                      | 2.65 $\pm$ 0.41                       |

<sup>a</sup>: The concentrations of supplemented sugars are all 0.5% (w/v) unless indicated;

RLU: relative light unit;

Data are the average of three independent cultures
